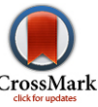

# Exploring the Polyadenylated RNA Virome of Sweet Potato through High-Throughput Sequencing

Ying-Hong Gu<sup>1,3</sup>, Xiang Tao<sup>2,3</sup>, Xian-Jun Lai<sup>1</sup>, Hai-Yan Wang<sup>1</sup>, Yi-Zheng Zhang<sup>1\*</sup>

**1** College of Life Sciences, Sichuan University, Key Laboratory of Bio-resources and Eco-environment, Ministry of Education, Sichuan Key Laboratory of Molecular Biology and Biotechnology, Center for Functional Genomics and Bioinformatics, Chengdu, Sichuan, People's Republic of China, **2** Chengdu Institute of Biology, Chinese Academy of Sciences, Chengdu, Sichuan, People's Republic of China

## Abstract

**Background:** Viral diseases are the second most significant biotic stress for sweet potato, with yield losses reaching 20% to 40%. Over 30 viruses have been reported to infect sweet potato around the world, and 11 of these have been detected in China. Most of these viruses were detected by traditional detection approaches that show disadvantages in detection throughput. Next-generation sequencing technology provides a novel, high sensitive method for virus detection and diagnosis.

**Methodology/Principal Findings:** We report the polyadenylated RNA virome of three sweet potato cultivars using a high throughput RNA sequencing approach. Transcripts of 15 different viruses were detected, 11 of which were detected in cultivar Xushu18, whilst 11 and 4 viruses were detected in Guangshu 87 and Jingshu 6, respectively. Four were detected in sweet potato for the first time, and 4 were found for the first time in China. The most prevalent virus was SPFMV, which constituted 88% of the total viral sequence reads. Virus transcripts with extremely low expression levels were also detected, such as transcripts of SPLCV, CMV and CymMV. Digital gene expression (DGE) and reverse transcription polymerase chain reaction (RT-PCR) analyses showed that the highest viral transcript expression levels were found in fibrous and tuberous roots, which suggest that these tissues should be optimum samples for virus detection.

**Conclusions/Significance:** A total of 15 viruses were presumed to present in three sweet potato cultivars growing in China. This is the first insight into the sweet potato polyadenylated RNA virome. These results can serve as a basis for further work to investigate whether some of the 'new' viruses infecting sweet potato are pathogenic.

**Citation:** Gu Y-H, Tao X, Lai X-J, Wang H-Y, Zhang Y-Z (2014) Exploring the Polyadenylated RNA Virome of Sweet Potato through High-Throughput Sequencing. PLoS ONE 9(6): e98884. doi:10.1371/journal.pone.0098884

**Editor:** Darren P. Martin, Institute of Infectious Disease and Molecular Medicine, South Africa

**Received:** January 21, 2014; **Accepted:** May 8, 2014; **Published:** June 5, 2014

**Copyright:** © 2014 Gu et al. This is an open-access article distributed under the terms of the Creative Commons Attribution License, which permits unrestricted use, distribution, and reproduction in any medium, provided the original author and source are credited.

**Funding:** This work was financially supported by the National Science & Technology Pillar Program of China (No. 2007BAD78B03) and the "Eleven-Five" Key Project of Sichuan Province (No. 07SG111-003-1). The funders had no role in study design, data collection and analysis, decision to publish, or preparation of the manuscript.

**Competing Interests:** The authors have declared that no competing interests exist.

\* E-mail: yizzhang@scu.edu.cn

These authors contributed equally to this work.

## Introduction

The sweet potato [*Ipomoea batatas* L. (Lam.)] originated in South America and was transported across the Pacific by Polynesians [1]. It has been cultivated by humans for up to 8,000 years, and today it is widely grown around the world due to its strong adaptability, easy management, rich nutrient content and multiple usages. Sweet potato is the fifth most important food crop in developing countries. About 130 million metric tons of tuberous roots are produced globally each year on about 9 million hectares of land [2,3]. China is the biggest producer in the world, accounting for 80% of the global sweet potato production [4]. Compared to other staple food crops sweet potato needs fewer inputs, but produces more biomass [5]. A few researchers have shown interest in sweet potato mainly because of its complex hexaploid inheritance [6]. Recently, the growing awareness of health benefits attributed to sweet potato has stimulated renewed interest in this crop [3].

Viral diseases are the second most significant biotic stress for sweet potato after the sweet potato weevil [7]. Usually, sweet

potato viruses will co-infect the plants and severely limit root production [8]. Yield losses caused by these viral diseases reach 20% to 40%, but this can reach near 100% in some African countries [9–12]. Over 30 viruses have been reported to infect sweet potato worldwide, but most of them are asymptomatic [3,13]. Eleven of these viruses have been detected in China [14], including *Sweet potato C6 virus* (SPC6V) [15], *Sweet potato chlorotic fleck virus* (SPCFV) [15], *Sweet potato chlorotic stunt virus* (SPCSV) [15–17], *Sweet potato collusive virus* (SPCV, synonym Sweet potato caulimovirus) [10], *Sweet potato feathery mottle virus* (SPFMV) [15,18–20], *Sweet potato leaf curl virus* (SPLCV) [21], *Sweet potato latent virus* (SwPLV) [19,20], *Sweet potato mild mottle virus* (SPMMV) [15], *Sweet potato mild speckling virus* (SPMSV) [15], *Sweet potato virus G* (SPVG) [20,22] and *Sweet potato virus 2* [SPV2, synonym *Ipomoea vein mosaic virus* (IVMV) or *Sweet potato virus Y* (SPVY)] [23,24]. SPFMV, SwPLV and SPCFV were recognized to be the most commonly occurring and damaging viruses in China [4,14]. Infection rates of these three viruses in major production regions of China range from 21% to 100% [15,17], resulting in annual

**Table 1.** Summary of RNA-Seq and DGE data used in this study.

| Accession No. | Cultivar    | Planting location | Tissue types             | No. of tags or read pairs | References | Note                |
|---------------|-------------|-------------------|--------------------------|---------------------------|------------|---------------------|
| SRA043582     | Xushu 18    | Chengdu           | Leaves, stems and roots  | 48,716,884                | [34]       | Sequencing directly |
| SRA043584     | Xushu 18    | Chengdu           | Flowers                  | 41,533,336                | [35]       | Sequencing directly |
| SRA022988     | Guangshu 87 | Guangzhou         | Roots                    | 59,233,468                | [32]       | Re-analyze          |
| SRA044884     | Jingshu 6   | Beijing           | Roots                    | 25,888,888                | [33]       | Re-analyze          |
| GSE35929      | Xushu 18    | Chengdu           | Young leaves             | 3,352,753                 | [34]       | Sequencing directly |
| GSE35929      | Xushu 18    | Chengdu           | Mature leaves            | 3,429,018                 | [34]       | Sequencing directly |
| GSE35929      | Xushu 18    | Chengdu           | Stems                    | 3,453,654                 | [34]       | Sequencing directly |
| GSE35929      | Xushu 18    | Chengdu           | Fibrous roots            | 3,583,907                 | [34]       | Sequencing directly |
| GSE35929      | Xushu 18    | Chengdu           | Initial tuberous roots   | 3,630,619                 | [34]       | Sequencing directly |
| GSE35929      | Xushu 18    | Chengdu           | Expanding tuberous roots | 3,566,630                 | [34]       | Sequencing directly |
| GSE35929      | Xushu 18    | Chengdu           | Harvested tuberous roots | 3,514,272                 | [34]       | Sequencing directly |

doi:10.1371/journal.pone.0098884.t001

economic losses of about \$639 million to the Chinese sweet potato industry [25].

Up until 1995, most of the work on sweet potato virus focused on SPFMV, but in the past 18 years, due to the advent of molecular biology, various comprehensive studies on virus composition and the effects of viral diseases were reported [3,26–28]. The development of next-generation sequencing (NGS) technology provides a highly sensitive method for virus detection and diagnosis [29–31]. In this study, we analyzed the NGS data of eight sweet potato tissues and re-analyzed those of the other two published studies [32,33] to identify RNA virus sequences.

## Materials and Methods

### Plant Material

Sweet potato plants (*I. batatas* cv. Xushu 18) were planted in an experimental field at Sichuan University under natural conditions. All of the following samples were collected from symptomless plants: Fibrous roots (FR) at one month after planting; young leaves (YL), mature leaves (ML), stems and initial tuberous roots (ITR) at 1.5 months; expanding tuberous roots at 3 months; harvested tuberous roots at 5 months; newly opened flowers were collected from symptomless drought-treated plants at 4 months.

### High-throughput RNA-sequencing

Total RNA was extracted using the TRIzol Reagent (Invitrogen), and genomic DNA removed with DNase I (Fermentas, Burlington, Ontario, Canada) according to the manufacturer's instructions. Then the purity, concentration and RNA integrity number (RIN) of total RNA were measured with a SMA3000 and/or Agilent 2100 Bioanalyzer. The assessed total RNA was submitted to the Beijing Genomics Institute (BGI)-Shenzhen, Shenzhen, China (<http://www.genomics.cn>) for mRNA purification and RNA sequencing (RNA-Seq) with Illumina HiSeq 2000.

### Viral Sequence Mining and Expression Pattern Analyses

To investigate the polyadenylated RNA virome of sweet potato, viral sequences and expression patterns were mined from the vegetative transcriptome of Xushu 18 according to the annotation information and Digital Gene Expression (DGE) profiling results [34]. We also extracted total RNA from floral organs of sweet potato cultivar Xushu 18 and submitted it to Illumina HiSeq 2000

for RNA-Seq analysis [35]. By using Bowtie [36] under default parameters except seed length of 40 and mismatches of 3, the 90 bp paired-end (PE) reads of the floral organs were mapped to the vegetative transcriptome, that has been known to contain some viral sequences. Moreover, the 75 bp PE reads of Guangshu 87 [32] and Jingshu 6 [33] retrieved from the NCBI's Sequence Read Archive database (<http://www.ncbi.nlm.nih.gov/Traces/sra>) (Table 1) were re-analyzed by using Bowtie [36] to align them to the vegetative transcriptome. The number of mapped read pairs or tags was counted according to the mapping results. RPKM (Reads Per Kilobase per Million mapped reads) [37] and TPM (Transcripts Per Million clean tags) [38] were calculated and used for quantifying each viral transcript in different sweet potato samples.

### Reverse Transcription Polymerase Chain Reaction (RT-PCR) Verification

Equal RNA extracted from FR, YL, ML, ITR and stems were reversely transcribed with Moloney murine leukemia virus (MMLV) reverse transcriptase (Invitrogen, Carlsbad, California, CA) using Oligo(dT) as primer. The resulting cDNA was subjected to viral sequence amplification and viral gene expression level analysis.

Fourteen pairs of primers were designed according to the assembled viral transcripts (Table 2) using Primer Premier 5.0 (PREMIER Biosoft, International, CA, USA) (Table 3), and sequence amplification was implemented using KOD-FX (TOYOBO, Osaka, Japan). The purified PCR products were sequenced with an ABI 3730 instrument to confirm the amplified sequences.

## Results

### Virus Identification via Next-generation Sequencing

Seven vegetative tissues were collected from sweet potato cv. Xushu 18 and equal RNA of each tissue sample was pooled together for RNA-Sequencing. A total of 48,716,884 PE reads were generated by Illumina/Solexa Genome Analyzer II. The *de novo* assembly and sequence annotation information were deposited at the Center for Functional Genomics and Bioinformatics of Sichuan University (<http://cfghi.scu.edu.cn/index.html>). All of the results described above have been published in 2012 [34]. Sequences of nine viruses were detected in the vegetative

**Table 2.** Statistics of viruses found in sweet potato transcriptome annotations, estimated gene expression abundance.

| Virus name                                | Abbreviation | Genus           | No. of Sequences | Total length (bp) | Identity (%) | Average expression levels (RPKM) | No. of read pairs |
|-------------------------------------------|--------------|-----------------|------------------|-------------------|--------------|----------------------------------|-------------------|
| <i>Sweet potato feathery mottle virus</i> | SPFMV        | Potyvirus       | 47               | 22,302            | 100          | 50.99                            | 46,434            |
| <i>Sweet potato virus G</i>               | SPVG         | Potyvirus       | 5                | 2,781             | 100          | 14.79                            | 1,680             |
| <i>Northern cereal mosaic virus</i>       | NCMV-like    | Cytorhabdovirus | 1                | 1,134             | 46           | 11.58                            | 536               |
| <i>Sweet potato virus B2</i>              | SPVB2        | Potyvirus       | 6                | 987               | 97           | 3.85                             | 155               |
| <i>Sweet potato latent virus</i>          | SwPLV        | Potyvirus       | 3                | 806               | 100          | 1.73                             | 57                |
| <i>Sweetpotato badnavirus B</i>           | SPBV-B       | Badnavirus      | 4                | 575               | 94           | 1.11                             | 26                |
| <i>Sweet potato virus 2</i>               | SPV2         | Potyvirus       | 3                | 419               | 100          | 1.40                             | 24                |
| <i>Sweetpotato badnavirus A</i>           | SPBV-A       | Badnavirus      | 2                | 250               | 97           | 1.57                             | 16                |
| <i>Mikania micrantha mosaic virus</i>     | MMMMV        | Fabavirus       | 5                | 736               | 100          | 1.25                             | 42                |
| <i>Yam mosaic virus</i>                   | YMV          | Potyvirus       | 1                | 230               | 94           | 5.11                             | 48                |
| <i>Turnip mosaic virus</i>                | TuMV-like    | Potyvirus       | 1                | 217               | 69           | 0.68                             | 6                 |
| <i>Sunflower mosaic virus</i>             | SuMV         | Potyvirus       | 1                | 198               | 96           | 1.36                             | 11                |

No. of Sequences means the viral transcripts detected in the vegetative transcriptome [34]. Total length means the sum of detected viral transcripts of each virus. Identity refers to sequence identities when similarity BLASTX search was conducted between assembled viral transcripts and NR database. YMV was further confirmed to be SPVG, and TuMV-like and SuMV were further confirmed to be SwPLV.  
doi:10.1371/journal.pone.0098884.t002

organs of this cultivar (Table 2, Table S1). Among these viruses, two belonged to the *Badnavirus* genus: SPBV-A (sweet potato badnavirus A) and SPBV-B (sweet potato badnavirus B) which were suggested to be Sweet potato pakakuy virus (SPPV) (International Committee on Taxonomy of Viruses, ICTV, <http://www.ictvonline.org>). The others were all RNA viruses, in which SPFMV, SPVG, SwPLV, SPV2 and SPVB2 (sweet potato virus B2), YMV (*Yam mosaic virus*), TuMV-like (*Turnip mosaic virus*) and SuMV (*Sunflower mosaic virus*) are from the *Potyvirus* genus; and NCMV-like (*Northern cereal mosaic virus*) and MMMV (*Mikania micrantha mosaic virus*) are from *Cytorhabdovirus* and *Fabavirus*, respectively. MMMV is also known as Mikania micrantha wilt virus (MMWV) as it was first discovered in *Mikania micrantha* [39]. Furthermore, the results demonstrated that SPFMV and SPVG had the longest total sequence length, the highest mapped reads number and the highest average expression levels (Table 2). Except for SPFMV, SPVG, SwPLV and SPV2, the others were reported in sweet potato in China for the first time.

Sequence alignment analyses demonstrated that the SPFMV transcripts belonged to at least three SPFMV strains in this sweet potato cultivar, including the severe, common and ordinary strains [40]. The common strain had been renamed as *Sweet potato virus C* (SPVC) (ICTV, <http://www.ictvonline.org>). Furthermore, at least two distinct transcripts related to SPVG strains were identified (Table 4). According to the NGS annotation information, there were 3 short sequences s (230 bp, 217 bp and 198 bp, respectively) been annotated as YMV, TuMV-like and SuMV (Table 2). Further studies of the recent released genome sequences of SPVG and SwPLV have confirmed that the 3 short sequences were indeed from SPVG and SwPLV.

Flowers of this cultivar were also collected and submitted to the NGS platform for RNA-Seq study. A total of 41,533,336 PE reads were generated [35]. By mapping these 90 bp PE reads to viral sequences retrieved from NCBI, and assembled viral sequences described above using Bowtie [36], we found four different virus-related transcripts belonging to SPFMV, SPVG, SPLCV and Cymbidium mosaic virus (CymMV). However, the mapped read number for them was only 6, 22, 3 and 20, respectively. These results indicated that fewer viral sequences presented in flowers than the vegetative organs. Of these, CymMV was found for the first time in sweet potato.

### Sequence Amplification by RT-PCR

RT-PCR analysis was conducted to verify whether all of these viral sequences existed in sweet potato cultivar Xushu 18. Fourteen pairs of primers were designed according to the assembled sequences (Table 3). Except MMMV, SPLCV and CymMV, 11 virus fragments of the expected sizes were successfully amplified from Xushu 18 (Figure 1). All amplified fragments were re-sequenced by the Sanger method and then were submitted for a sequence similarity search by BLASTN or TBLASTN. The results showed that all fragments had a high identity of  $\geq 95\%$  with the assembled sequences (Table 4). These indicated that deep sequencing technology could provide a reliable method to identify viral sequences. Two of the three SPFMV sequences identified by NGS showed 99% sequence identity with SPVC and the severe strain of SPFMV. Two SPVG sequences showed 99% and 78% identity with two different SPVG strains.

Comparing the re-sequenced fragments with the reference sequences retrieved from NCBI, the identities decreased for most of these amplified fragments, especially for the NCMV-like fragment (Table 4). The SPBV-B fragment shared 77% sequence identity with the reference sequence, and SPBV-A shared 94% identity with the reference in a short segment. These results

**Table 3.** Primers used for virus fragment amplification.

| No. | Virus name | Primer name | Primer sequence (5'-3')  | Product length (bp) |
|-----|------------|-------------|--------------------------|---------------------|
| 1   | SPVC       | SPVC-CP1F   | TCGGTGTATCATCAATCTGGC    | 560                 |
|     |            | SPVC-CP1R   | CCATCCATCATCGTCCAAAC     |                     |
| 2   | SPFMV      | SPFMV-SP1F  | CTCCACCACCACAATAACTG     | 402                 |
|     |            | SPFMV-SP1R  | TCCCCATTCTGTATCGTCA      |                     |
| 3   | SPVB2      | SPVB2-P3F   | GAGACAGCAGAAACAGCAGTGATA | 471                 |
|     |            | SPVB2-P3R   | GGCATCACAATAAACCCATCCT   |                     |
| 4   | SPVG       | SPVG-1F     | ACAACGTGCATCATCAGTCT     | 459                 |
|     |            | SPVG-1R     | CATTTGCCATTGGTGCTCTT     |                     |
| 5   | SPVB2      | SPVB2-P1F   | AAGCATGTGGTGAAGGAAAGTG   | 361                 |
|     |            | SPVB2-P1R   | TTGCTTGTCATCCATTCCCTC    |                     |
| 6   | SPVG       | SPVG-2F     | CGCCAATAATAGCGAACTCT     | 549                 |
|     |            | SPVG-2R     | ACTATACGTCCATTGCCATC     |                     |
| 7   | SPBV-B     | SPBV-C2PF   | CAGGATTCATCAGCAGACG      | 352                 |
|     |            | SPBV-C2PR   | ATGTCATGAAGGCACCTTCC     |                     |
| 8   | SPBV-A     | SPBV-C1PF   | CAGCTTTGGTTGCTCTGTATTT   | 477                 |
|     |            | SPBV-C1PR   | AAGACGGTTGGCCATTGATAT    |                     |
| 9   | SPV2       | IVMV-P1F    | TGCTGAAATGGGCATACTCC     | 489                 |
|     |            | IVMV-P1R    | TGCACACTCTCATTCTAACA     |                     |
| 10  | SwPLV      | SwPLV-P1F   | CGAAGTGATGACCAGCAGAT     | 500                 |
|     |            | SwPLV-P1R   | GGATTCCACGCATTCCAAGTAG   |                     |
| 11  | NCMV-like  | IbRNLS-PF   | TCACCACAGAGGTACAAGGAAA   | 1317                |
|     |            | IbRNLS-PR   | ACCATGATTTACATCTCTGTCCG  |                     |
| 12  | MMWV       | MMWV2-P1F   | ATGGTTGAATGCTCCCAAGACA   | 499                 |
|     |            | MMWV2-P1R   | CTCTCCATCCAATCCCACCTAT   |                     |
| 13  | SPLCV      | SPLCV-P1F   | GAAGCTATGTCCCGTTTCAAGAG  | 300                 |
|     |            | SPLCV-P1R   | GCCTTCTGTCACGAATCAACCA   |                     |
| 14  | CymMV      | CymMV-P1F   | CCTGAGCCCTTCTGTACCATA    | 775                 |
|     |            | CymMV-P1R   | GTGTGGTGGAGCCAAGATG      |                     |

doi:10.1371/journal.pone.0098884.t003

indicated that SPBV-A and SPBV-B could perhaps be new sweet potato viruses. In this study we tentatively named them as Sweet potato badnavirus C (SPBV-C). Interestingly, the NCMV-like fragment failed to find a homologous nucleotide sequence from NCBI by BLASTN, so TBLASTN was employed to blast the deduced protein sequences to the translated nucleotide database. The results showed that it was homologous with Rhabdovirus N-like sequences (RNLSs) [41] and should be a new sweet potato virus. So we tentatively named it as *Ipomoea batatas* Rhabdovirus N-like sequences, IbRNLS.

### Confirmation of Four New Sweet Potato Viruses

To identify whether these four new virus-related sequences are present in other sweet potato cultivars in China, we collected eight different sweet potato tuberous root samples from different regions in Sichuan Province, China (Table 5). All of these eight sweet potato cultivars were cultivated by farmers under natural conditions. Total RNA was extracted for RT-PCR analysis. The results demonstrated that the SPBV-C1 viral sequence was amplified from three cultivars, SPBV-C2 was amplified from four cultivars, the NCMV-like presented itself in all eight tuberous root samples, and CymMV presented itself in four samples (Figure 2).

These results confirmed that four new virus-related sequences are present in most of the sweet potato cultivars in this region.

### Expression Patterns among Different Tissues

DGE provides a new expression analysis method showing major advances in robustness, resolution and inter-lab portability over microarray and quantitative RT-PCR [42]. For this technology, 21 bp tags were sequenced for each mRNA; the tag number of each transcript gave a digital signal to characterize the expression patterns. To study the gene expression patterns of each virus transcript, all DGE tags from the seven vegetative tissues [34] (Table 1) were used for expression profiling. It was found that there were 16 transcripts containing a *Nla*III recognition site (CATG), which is the motif of DGE tags. These transcripts belonged to SPVC (5 transcripts), SPFMV (5 transcripts), SPVG (3 transcripts), SPV2 (2 transcripts), SwPLV (1 transcript) and NCMV-like (1 transcript). DGE quantification results showed that different viral transcripts had different expression levels (Figure 3). Transcripts of SPVC, SPFMV and SPVG had very high expression levels, which were about 100 times higher than that of the SwPLV transcript. These are consistent with the findings described above and illustrate that SPVC, SPFMV and SPVG may be the most prevalent viruses in China. Furthermore, it was

**Table 4.** Sequencing results of amplified viral fragments.

| #  | Length<br>(bp) | Identities (%) <sup>a</sup> |    | Coverage <sup>b</sup><br>(%) | E-value <sup>c</sup> | Viral names | GenBank Accession<br>Numbers |
|----|----------------|-----------------------------|----|------------------------------|----------------------|-------------|------------------------------|
|    |                | A                           | B  |                              |                      |             |                              |
| 1  | 497            | 97.99                       | 99 | 99                           | 0                    | SPVC        | JQ902097                     |
| 2  | 358            | 98.88                       | 99 | 100                          | 3.00E-175            | SPFMV       | JQ902098                     |
| 3  | 436            | 99.54                       | 83 | 83                           | 5.00E-97             | SPVB2       | JQ902099                     |
| 4  | 394            | 98.48                       | 99 | 100                          | 0                    | SPVG-1      | JQ902100                     |
| 5  | 315            | 99.68                       | 77 | 98                           | 3.00E-60             | SPVB2       | JQ902101                     |
| 6  | 510            | 98.24                       | 78 | 99                           | 4.00E-112            | SPVG-2      | JQ902102                     |
| 7  | 308            | 99.25                       | 77 | 99                           | 7.00E-48             | SPBV-B      | JQ902103                     |
| 8  | 438            | 99.58                       | 94 | 23                           | 0.004                | SPBV-A      | JQ902104                     |
| 9  | 428            | 99.77                       | 99 | 100                          | 0                    | SPV2        | JQ902105                     |
| 10 | 462            | 95.64                       | 96 | 98                           | 0                    | SwPLV       | JQ902106                     |
| 11 | 981            | 99.80                       | 39 | 88                           | 4.00E-76             | * IbRNLS    | JQ902107                     |

Sequence numbers are corresponded to Table 3;

<sup>a</sup>Sequence identities (A) were calculated between assembled and Sanger sequenced fragments; Sequence identities (B) were calculated between Sanger sequenced fragments and reference sequences from NCBI;

<sup>b</sup>Indicate the query coverage and E-value of Sanger sequenced segments BLAST against the reference sequences from NCBI;

<sup>c</sup>This is a Cytorhabdovirus-like sequence; the corresponding sequence identity (B), query coverage and E-value were obtained by TBLASTN searches.

doi:10.1371/journal.pone.0098884.t004



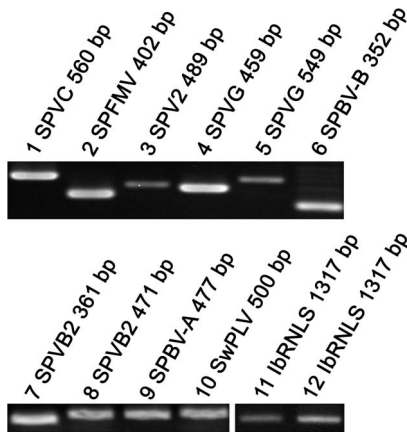

**Figure 1. Electrophoresis of PCR products of amplified viral sequences.** 1~10 correspond to sequence numbers in Table 3 of 1 (560 bp), 2 (402 bp), 9 (489 bp), 4 (459 bp), 6 (549 bp), 7 (352 bp), 5 (361 bp), 3 (471 bp), 8 (477 bp) and 10 (500 bp), respectively. 11 and 12 correspond to sequence numbers in Table 3 of 11 (1317 bp) amplified from cDNA and genomic DNA, respectively.  
doi:10.1371/journal.pone.0098884.g001

found that all these viral transcripts were unevenly distributed in different tissues (Figure 3). Five of these six viruses possessed the highest expression level in fibrous roots, while the remaining one, in expanding tuberous roots. Initial tuberous roots also had a comparably high expression level for most of them, but young leaves, mature leaves and stem had lower expression levels. For example, SPFMV (Transcript\_11) had an expression level of 107.97 TPM in fibrous roots and 31.12 TPM in initial tuberous roots, but only 1.75 TPM in mature leaves and no expression in young leaves. The highest expression levels of SPVC (Transcript\_859) was also observed in fibrous roots (688.35 TPM), followed by stem (230.48 TPM) and initial tuberous roots (219.25 TPM).

By using sweet potato beta-actin as an internal control, expression levels of SPVC, SPFMV, SPVG, SPV2 and SwPLV transcripts were analyzed by semi-quantitative RT-PCR (Figure 4). For SPVC, fibrous and initial tuberous roots had almost equal expression levels, while young and mature leaves had the lowest levels. For SPFMV, highest expression levels were detected in fibrous roots, followed by initial tuberous roots, and no expression was observed in leaves. Similar expression patterns were also found for SPVG. But SPV2 and SwPLV had different expression patterns. The highest expression level was observed in stems for

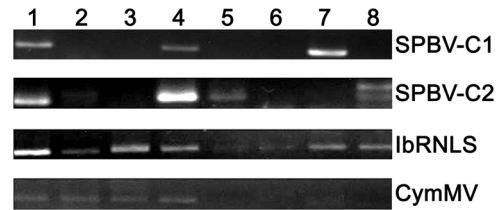

**Figure 2. Amplification of four novel viruses from different sweet potato cultivars.** 1~8 correspond to sample numbers in Table 5.  
doi:10.1371/journal.pone.0098884.g002

SPV2 and young leaves for SwPLV. However, for these two viruses, fibrous or initial tuberous roots also had relatively high expression abundance. There are some slightly differences of the relative expression levels among different tissues quantified by DGE and RT-PCR. But the reason for this discrepancy of the results between these two methods is unknown.

### Virus Identification in other Sweet Potato Cultivars

To investigate the polyadenylated RNA virome of the Guangshu 87 and Jingshu 6 cultivars, all the PE reads of their transcriptomes [32,33] were aligned with viral sequences retrieved from NCBI, and the assembled sweet potato transcriptome. Results demonstrated that sequences of 11 virus species were found in cultivar Guangshu 87, including SPFMV, SPVG, SwPLV, SPLCV, SPCFV, SPVB1, SPVB2, SPVB3, SPBV-A, SPBV-B and CymMV. Sequences of 4 viruses were found in Jingshu 6, including SPFMV, SPVG, SPCFV and Cucumber mosaic virus (CMV). SPFMV and SPVG had the highest expression levels amongst all the viruses in these two cultivars (Table 6). Combining together all viruses identified from the three cultivars, we detected a total of 15 viruses, most of which were reported for the first time in China. Among these viruses, SPVC, SPFMV and SPVG had the highest expression levels in all three cultivars.

### Discussion

Sweet potato virus is usually detected using indicator plants such as *Ipomoea setosa*, *Ipomoea nil* and *Chenopodium quinoa* [10,43], and electron microscopic observation [44], while molecular diagnosis is conducted using enzyme-linked immunosorbent assay (ELISA) [43,45] or RT-PCR [18,26,46–48]. During the last decades, over 30 sweet potato viruses were detected in the world [3,13], and 11 of these have been reported in China [14]. SPFMV, SPLV and

**Table 5. Sweet potato cultivars collected from different regions.**

| Sample No. | Cultivar    | Source                                                 |
|------------|-------------|--------------------------------------------------------|
| 1          | Chuanshu 34 | Sichuan academy of agricultural sciences, Chengdu City |
| 2          | Liyuan 1    | Dayi County, Chengdu City                              |
| 3          | Nanshu 007  | Dayi County, Chengdu City                              |
| 4          | Nanshu 88   | Dayi County, Chengdu City                              |
| 5          | Unknown     | Tianquan County, Ya'an City                            |
| 6          | Xushu 18    | Weiyuan County, Neijiang City                          |
| 7          | Yusu 303    | Dayi County, Chengdu City                              |
| 8          | Xushu 18    | Zizhong County, Neijiang City                          |

doi:10.1371/journal.pone.0098884.t005

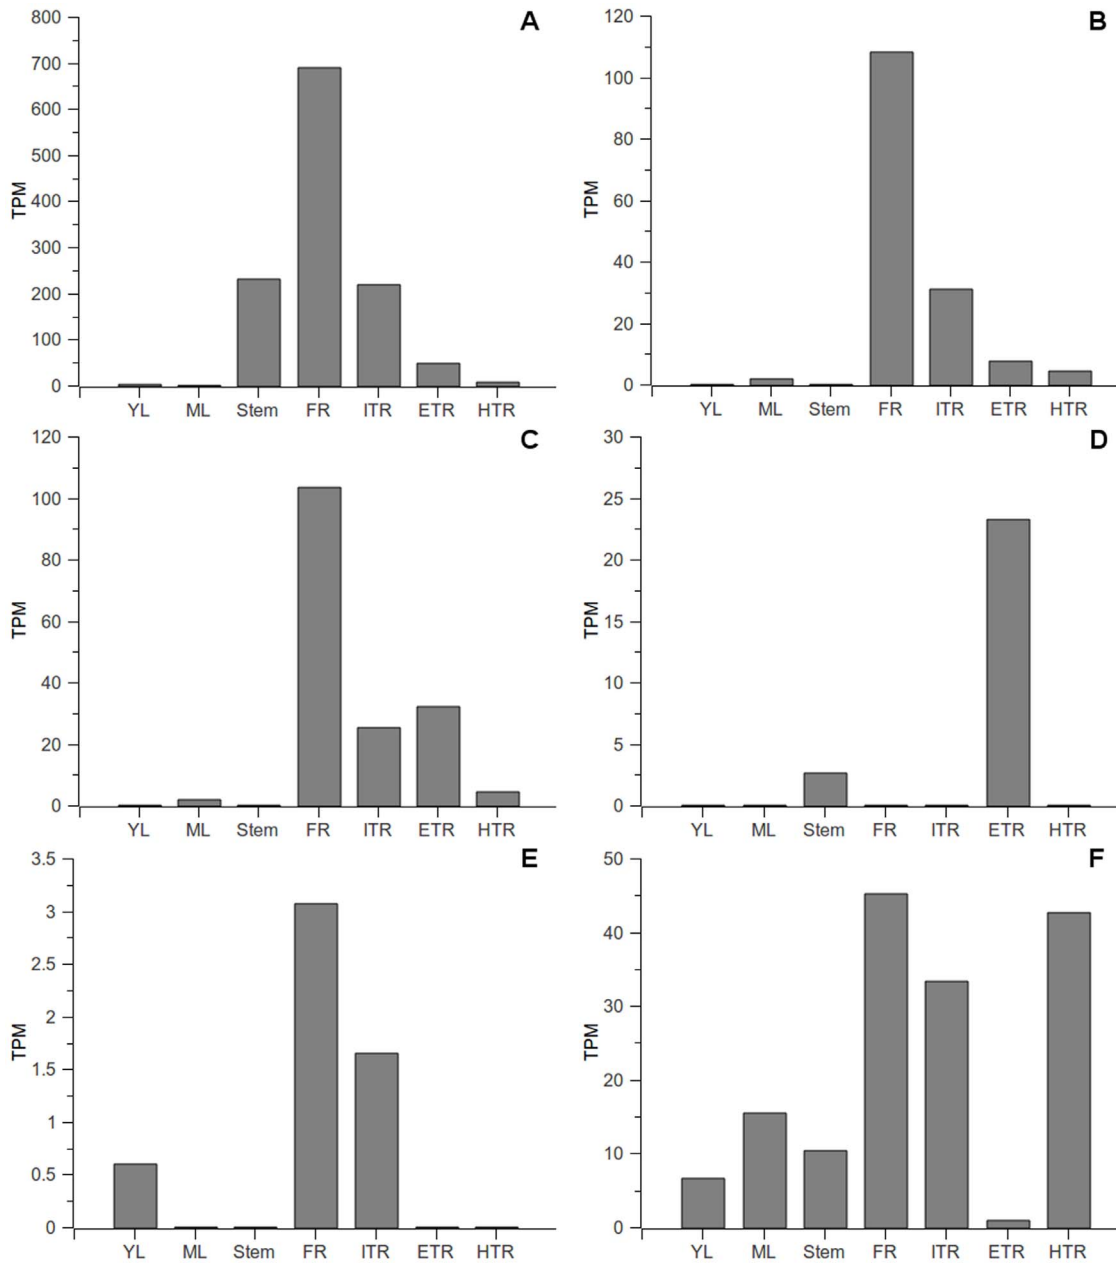

**Figure 3. Digital gene expression analyses of different viral transcripts.** TPM: Transcripts Per Million clean tags (Morrissy AS, 2009); YL, ML, Stem, FR, ITR, ETR and HTR indicate young leaves, mature leaves, stems, fibrous roots, initial tuberous roots, expanding tuberous roots and harvest tuberous roots, respectively; A~F: indicate SPVC (Transcript\_859), SPFMV (Transcript\_11), SPVG (Transcript\_5373), SPV2 (Transcript\_81617), SwPLV (Transcript\_95916) and NCMV-like (Transcript\_5902), respectively. doi:10.1371/journal.pone.0098884.g003

SPCFV are considered as the major viruses in China [4,14]. The advent of high-throughput sequencing technology offers a new and powerful approach for characterization of viruses. This methodology shows major advances in robustness, resolution and inter-lab portability [42]. It not only identifies known viruses, but also can identify low-titer and novel viral species without any prior knowledge [31].

In recent years, there were several groups investigating viral infection agents using high-throughput sequencing technology. For example, Kreuze *et al* successfully detected novel viruses from infected sweet potato and constructed complete viral genomic sequences by *de novo* assembling of 21 and 22 bp NGS reads [31],

and Coetzee *et al* characterized the virome of a diseased South African vineyard [30]. In this study, transcripts of 11 virus species were identified in cultivar Xushu 18 through NGS data mining. For the vegetative transcriptome, 88% of the mapped viral PE reads were aligned to SPFMV or SPVC, and 87% of the rest were aligned to SPVG, these illustrated that SPFMV, SPVC and SPVG may be the most prevalent viruses in this cultivar. However, transcripts of only four virus species were detected in the flowers of Xushu 18, all of which had very low expression levels, which may indicate that viruses primarily accumulate in vegetative organs than in floral ones. Totally, transcripts of 15 viruses were identified from three sweet potato cultivars growing in China, four of which

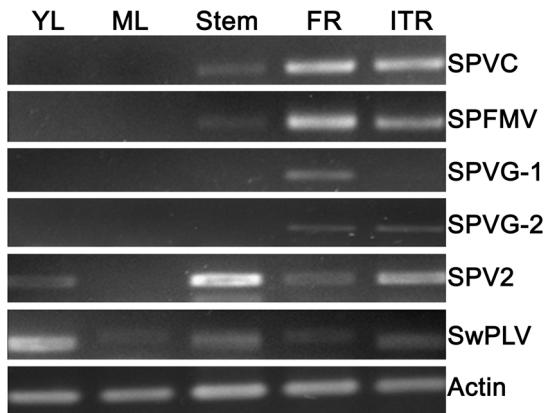

**Figure 4. Virus gene expression levels among different tissues.** YL, ML, Stem, FR, ITR, ETR and HTR indicate young leaves, mature leaves, stems, fibrous roots, initial tuberous roots, expanding tuberous roots and harvest tuberous roots, respectively.  
doi:10.1371/journal.pone.0098884.g004

are novel sweet potato viruses, and several of which are reported in China for the first time.

Of the reported sweet potato viruses, most are associated with symptomless infections in sweet potato and in some cases even in the indicator plant. Some are synergized by SPCSV, the mediator of severe virus diseases in sweet potato, while others apparently are not [3]. Otherwise, sweet potato cultivars differ greatly in their reaction to the viruses, with some being symptomlessly infected, while others apparently immune [49]. The most common virus infecting sweet potato worldwide, SPFMV, can be symptomless, at least in some varieties [45,50]. Previous research showed that nearly 70% of the symptomless plants were SPFMV-infected in a virus survey in Kenya [51]. In this study, although transcripts of 15 viruses were identified, no SPCSV related fragment was found. This may be the reason why so many virus fragments were detected from Xushu 18 but no symptom could be observed. Our results also indicated that most of the symptomless field-grown sweet potatoes were infected by several viruses. Usually, leaves are

collected for virus detection in sweet potato [48,52]. However, based on the DGE (Figure 3) and RT-PCR (Figure 4) analyses in this study, we found that expression levels of most virus transcripts were unevenly distributed in different tissues. Most virus transcripts possess extremely low expression levels in young and mature leaves, but higher expression levels in fibrous roots and initial tuberous roots. This indicated that using leaves as a test sample may give false negative results, while fibrous root should be the optimal choice for virus detection in this crop.

Sweet potato is vegetatively propagated from tuberous roots or vines, and farmers usually take vines for propagation from the farm year after year. If the sweet potato is infected with viruses, they will be transmitted to the next generation and accumulate in this crop, resulting in significantly decreased yields. The virus expression analyses results described in this study indicated that high expression levels of most viruses in fibrous and initial tuberous roots may be the main reason for the germplasm decline and production decrease. For sweet potato, adventitious roots develop at the nodes of a vine cutting, and then some of these roots change their growth pattern and develop into tuberous roots [53]. Depending on the number of fibrous roots that will be induced to form tuberous roots, sweet potato plants will yield either a high root production or a low number of tuberous roots [53]. High virus expression levels in fibrous roots will adversely affect the development of the root system and then result in tuberous root initiation failure. A well-developed root system is a prerequisite for healthy plant growth [14,54–56] and is recognized as a key factor of high tuberous root yield [57]. The development failure of tuberous roots caused by virus infection will significantly decrease the total bio-mass production. Previous studies demonstrated that tuberous roots of virus-infected sweet potato form later and expand slower than virus-free ones [14,54]. Compared with that of healthy plants, virus-infected plants have a significantly higher respiration rate and lower photosynthetic rate [57,58], and are more easily infected by the fungal pathogens *Monilochaetes infuscans* and *Ceratocystis fimbriata*, and the nematode *Pratylenchus coffeae*. All these physiological characteristics will inevitably result in final yield loss.

**Table 6. Viral species detected by deep sequencing of other 3 sweet potato variety.**

| Virus name | No. of read pairs |             |           |
|------------|-------------------|-------------|-----------|
|            | Xushu 18          | Guangshu 87 | Jingshu 6 |
| SPFMV      | 6                 | 66,464      | 127       |
| SPVG       | 22                | 9,332       | 511       |
| SwPLV      | 0                 | 126         | 0         |
| SPLCV      | 3                 | 12          | 0         |
| SPCFV      | 0                 | 1,055       | 17        |
| SPVB1      | 0                 | 12          | 0         |
| SPVB2      | 0                 | 36          | 0         |
| SPVB3      | 0                 | 5           | 0         |
| SPBV-A     | 0                 | 2           | 0         |
| SPBV-B     | 0                 | 22          | 0         |
| CymMV      | 20                | 1           | 0         |
| CMV        | 0                 | 0           | 3         |

doi:10.1371/journal.pone.0098884.t006



## Supporting Information

**Table S1** Sequences annotation of candidate viral sequences identified from the sweet potato transcriptome. (XLSX)

## Acknowledgments

We thank Saanya Sequeira at University of East Anglia for critical reading of the manuscript.

## References

- O'Brien PJ (1972) The Sweet Potato: Its Origin and Dispersal. *American anthropologist* 74: 342–365.
- Srinivas T (2009) Economics of sweetpotato production and marketing. In: Loebenstein G, Thottappilly G, editors. *The sweetpotato*: Springer. 235–267.
- Clark CA, Davis JA, Abad JA, Cuellar WJ, Fuentes S, et al. (2012) Sweetpotato viruses: 15 years of progress on understanding and managing complex diseases. *Plant Dis* 96: 168–185.
- Zhang LM, Wang QM, Liu QC, Wang QC (2009) Sweetpotato in China. In: Loebenstein G, Thottappilly G, editors. *The Sweetpotato*: Springer Netherlands. 325–358.
- De Vries CA, Ferwerda JD, Flach M (1967) Choice of food crops in relation to actual and potential production in the tropics. *Neth J Agr Sci* 15: 241–248.
- Varshney RK, Glaszmann JC, Leung H, Ribaut JM (2010) More genomic resources for less-studied crops. *Trends Biotechnol* 28: 452–460.
- Geddes AMW (1990) The relative importance of crop pests in sub-Saharan Africa.
- Schaefer GA, Terry ER (1976) Insect transmission of sweet potato disease agents in Nigeria. *Phytopathology* 66: 642–645.
- Clark CA, Smith TP, Ferrin DM, Villordon AQ (2010) Performance of sweetpotato foundation seed after incorporation into commercial operations in Louisiana. *Horttechnology* 20: 977–982.
- Gao F, Gong YF, Zhang PB (2000) Production and deployment of virus-free sweetpotato in China. *Crop Prot* 19: 105–111.
- Karyeija RF, Gibson RW, Valkonen JPT (1998) The significance of sweet potato feathery mottle virus in subsistence sweet potato production in Africa. *Plant Dis* 82: 4–15.
- Stathers T, Namanda S, Mwanga ROM, Khisa G, Kapinga R (2005) Manual for Sweetpotato Integrated Production and Pest Management Farmer Field Schools in Sub-Saharan Africa. International Potato Center, Kampala, Uganda. 168.
- Trenado HP, Orilio AF, Márquez-Martín B, Moriones E, Navas-Castillo J (2011) Sweepviruses cause disease in sweet potato and related *Ipomoea spp.*: fulfilling Koch's postulates for a divergent group in the genus *Begomovirus*. *Plos One* 6: e27329.
- Wang QM, Zhang LM, Wang B, Yin ZF, Feng CH, et al. (2010) Sweetpotato viruses in China. *Crop Prot* 29: 110–114.
- Zhang LM, Wang QM, Ma DF, Wang Y (2006) The effect of major viruses and virus-free planting materials on sweetpotato root yield in China. *Acta Hort* 703: 71–78.
- Qiao Q, Zhang ZC, Qin YH, Zhang DS, Tian YT, et al. (2010) First report of sweet potato chlorotic stunt virus infecting sweet potato in China. *Plant Dis* 95: 356–356.
- Zhang LM, Wang QM, Ma DF, Wang Y (2005) Major viruses and effect of major virus diseases and virus-eliminating meristem culture on sweetpotato yield and quality in China. *Acta Botanica Boreali-Occidentalia Sinica* 25: 316–320 (in Chinese, English Abstract).
- Colinet D, Kummert J (1993) Identification of a sweet potato feathery mottle virus isolate from China (SPFMV-CH) by the polymerase chain reaction with degenerate primers. *J Virol Methods* 45: 149–159.
- Colinet D, Kummert J, Lepoivre P (1997) Evidence for the assignment of two strains of SPLV to the genus *Potyvirus* based on coat protein and 3' non-coding region sequence data. *Virus Res* 49: 91–100.
- Colinet D, Nguyen M, Kummert J, Lepoivre P, Xia FZ (1998) Differentiation among potyviruses infecting sweet potato based on genus- and virus-specific reverse transcription polymerase chain reaction. *Plant Dis* 82: 223–229.
- Luan YS, Zhang J, An LJ (2006) First report of Sweet potato leaf curl virus in China. *Plant Dis* 90: 1111–1111.
- Colinet D, Lepoivre P, Xia FZ, Kummer J (1996) Detection and identification of sweet potato viruses by the polymerase chain reaction. *Agro Food Ind Hi Tec* 7: 33–34.
- Ateka EM, Barg E, Njeru RW, Thompson G, Vetten HJ (2007) Biological and molecular variability among geographically diverse isolates of sweet potato virus 2. *Arch Virol* 152: 479–488.
- Ateka EM, Barg E, Njeru RW, Lesemann DE, Vetten HJ (2004) Further characterization of 'sweet potato virus 2': a distinct species of the genus *Potyvirus*. *Arch Virol* 149: 225–239.
- Zhang YQ, Guo HC (2005) Research progress on the tip meristem culture of sweet potato. *Chinese Agr Sci Bull* 21: 74–76 (in Chinese, English abstract).

## Author Contributions

Conceived and designed the experiments: YZZ HYW YHG. Performed the experiments: YHG XT XJL. Analyzed the data: YHG XT. Contributed reagents/materials/analysis tools: YHG XT XJL. Wrote the paper: YHG XT. Revised the manuscript: YHG XT YZZ HYW.

- Li F, Zuo R, Abad J, Xu D, Bao G, et al. (2012) Simultaneous detection and differentiation of four closely related sweet potato potyviruses by a multiplex one-step RT-PCR. *J Virol Methods* 186: 161–166.
- Mbanzibwa DR, Tairo F, Gwandu C, Kullaya A, Valkonen JPT (2012) First Report of Sweetpotato symptomless virus 1 and Sweetpotato virus A in sweetpotatoes in Tanzania. *Plant Dis* 96: 1430–1437.
- Valverde RA, Clark CA, Valkonen JP (2007) Viruses and virus disease complexes of sweetpotato. *Plant Viruses* 1: 116–126.
- Al Rwahnih M, Daubert S, Golino D, Rowhani A (2009) Deep sequencing analysis of RNAs from a grapevine showing Syrah decline symptoms reveals a multiple virus infection that includes a novel virus. *Virology* 387: 395–401.
- Coetzee B, Freeborough MJ, Maree HJ, Celton JM, Rees DJG, et al. (2010) Deep sequencing analysis of viruses infecting grapevines: virome of a vineyard. *Virology* 400: 157–163.
- Kreuze JF, Perez A, Untiveros M, Quispe D, Fuentes S, et al. (2009) Complete viral genome sequence and discovery of novel viruses by deep sequencing of small RNAs: a generic method for diagnosis, discovery and sequencing of viruses. *Virology* 388: 1–7.
- Wang Z, Fang B, Chen J, Zhang X, Luo Z, et al. (2010) De novo assembly and characterization of root transcriptome using Illumina paired-end sequencing and development of cSSR markers in sweet potato (*Ipomoea batatas*). *Bmc Genomics* 11: 726.
- Xie F, Burklew CE, Yang Y, Liu M, Xiao P, et al. (2012) De novo sequencing and a comprehensive analysis of purple sweet potato (*Ipomoea batatas* L.) transcriptome. *Planta* 236: 101–113.
- Tao X, Gu YH, Wang HY, Zheng W, Li X, et al. (2012) Digital gene expression analysis based on integrated de novo transcriptome assembly of sweet potato [*Ipomoea batatas* (L.) Lam]. *Plos One* 7: e36234.
- Tao X, Gu YH, Jiang YS, Zhang YZ, Wang HY (2013) Transcriptome Analysis to Identify Putative Floral-Specific Genes and Flowering Regulatory-Related Genes of Sweet Potato. *Biosci Biotechnol Biochem* 77: 2169–2174.
- Langmead B, Trapnell C, Pop M, Salzberg SL (2009) Ultrafast and memory-efficient alignment of short DNA sequences to the human genome. *Genome Biol* 10: R25.
- Mortazavi A, Williams BA, McCue K, Schaeffer L, Wold B (2008) Mapping and quantifying mammalian transcriptomes by RNA-Seq. *Nat Methods* 5: 621–628.
- Morrissy AS, Morin RD, Delaney A, Zeng T, McDonald H, et al. (2009) Next-generation tag sequencing for cancer gene expression profiling. *Genome Res* 19: 1825–1835.
- Wang RL, Ding LW, Sun QY, Li J, Xu ZF, et al. (2008) Genome sequence and characterization of a new virus infecting *Mikania micrantha* H.B.K. *Arch Virol* 153: 1765–1770.
- Kreuze JF, Karyeija RF, Gibson RW, Valkonen JPT (2000) Comparisons of coat protein gene sequences show that East African isolates of Sweet potato feathery mottle virus form a genetically distinct group. *Arch Virol* 145: 567–574.
- Chiba S, Kondo H, Tani A, Saisho D, Sakamoto W, et al. (2011) Widespread endogenization of genome sequences of non-retroviral RNA viruses into plant genomes. *PLoS pathog* 7: e1002146.
- AC't Hoen P, Ariyurek Y, Thygesen HH, Vreugdenhil E, Vossen RH, et al. (2008) Deep sequencing-based expression analysis shows major advances in robustness, resolution and inter-lab portability over five microarray platforms. *Nucleic Acids Res* 36: e141–e141.
- Aritua V, Alicai T, Adipala E, Carey EE, Gibson RW (1998) Aspects of resistance to sweet potato virus disease in sweet potato. *Ann Appl Biol* 132: 387–398.
- Yang C, Shang Y, Zhao J, Li C (1998) Produce techniques and practice of virus-free sweet potato. *Acta Phytophylacica Sinica* 25: 51–55.
- Gibson RW, Mpembe I, Alicai T, Carey EE, Mwanga ROM, et al. (1998) Symptoms, aetiology and serological analysis of sweet potato virus disease in Uganda. *Plant Pathol* 47: 95–102.
- Gibbs A, Mackenzie A (1997) A primer pair for amplifying part of the genome of all potyvirids by RT-PCR. *J Virol Methods* 63: 9–16.
- Li F, Xu D, Abad J, Li R (2012) Phylogenetic relationships of closely related potyviruses infecting sweet potato determined by genomic characterization of Sweet potato virus G and Sweet potato virus 2. *Virus Genes* 45: 118–125.
- Perez-Egusquiza Z, Ward LI, Clover GRG, Fletcher JD (2009) Detection of Sweet potato virus 2 in sweet potato in New Zealand. *Plant Dis* 93: 427–427.
- Loebenstein G, Thottappilly G, Fuentes S, Cohen J (2009) Virus and phytoplasma diseases. *The sweetpotato*: Springer. 105–134.

50. Gibson RW, Mwanga ROM, Kasule S, Mpenbe I, Carey EE (1997) Apparent absence of viruses in most symptomless field-grown sweet potato in Uganda. *Ann Appl Biol* 130: 481–490.
51. Ateka EM, Njeru RW, Kibaru AG, Kimenju JW, Barg E, et al. (2004) Identification and distribution of viruses infecting sweet potato in Kenya. *Ann Appl Biol* 144: 371–379.
52. Kokkinos CD, Clark CA (2006) Real-Time PCR assays for detection and quantification of sweetpotato viruses. *Plant Dis* 90: 783–788.
53. Firon N, LaBonte D, Villordon A, McGregor C, Kfir Y, et al. (2009) Botany and physiology: storage root formation and development. In: G L, G T, editors. *The sweetpotato* Springer. 13–26.
54. Du XH, Zhan HJ, Xu QY, Wang QC, Niu YZ, et al. (1999) Effects of virus elimination on several physiological characteristics of sweetpotato. *Plant Physiol Commun* 35: 185–187 (in Chinese).
55. Khan MB, Rafiq R, Hussain M, Farooq M, Jabran K (2012) Ridge sowing improves root system, phosphorus uptake, growth and yield of Maize (*Zea Mays* L.) Hybrids. *Measurements* 22: 309–317.
56. Ma C, Naidu R, Liu F, Lin C, Ming H (2012) Influence of hybrid giant Napier grass on salt and nutrient distributions with depth in a saline soil. *Biodegradation* 23: 907–916.
57. Nie F, Xu YH, Qian J, Chen JX, Dong L (2000) Effects of virus-free techniques on development and growth of sweet potato. *Chinese Agr Sci Bull* 16: 13–15 (in Chinese, English abstract).
58. Chen XY, Chen FX, Yuan ZN, Zhuang BH (2001) Effect of virus-elimination on some physiological indices in sweet potato. *J Fujian Agr Univ* 30: 449–453 (in Chinese, English abstract).
